# Supplementary material
Source: publisher site journal article supplement (https://www.dovepress.com/article/423558)
Supplement: Supplementary file 1 [file get_supplementary_file.php]

| **Supplementary Table 1.** The mathematical details (units, formulas) of dietary inflammation index. | |
| --- | --- |
| Food parameter | Overall inflammatory effect score |
| Energy (kcal) | 0.18 |
| Alcohol (g) | -0.278 |
| Cholesterol (mg) | 0.11 |
| Caffeine (g) | -0.11 |
| Fat (g) | 0.298 |
| Fiber (g) | -0.663 |
| Folic Acid (μg) | -0.19 |
| β-carotene (μg) | -0.584 |
| Iron (mg) | 0.032 |
| Magnesium (mg) | -0.484 |
| Zinc (mg) | -0.313 |
| Selenium (μg) | -0.191 |
| Thiamin (mg) | -0.098 |
| Vitamin A (RE) | -0.401 |
| Vitamin B 6 (mg) | -0.365 |
| Vitamin B 12 (μg) | 0.106 |
| Vitamin C (mg) | -0.424 |
| Vitamin D (μg) | -0.466 |
| Vitamin E (mg) | -0.419 |
| Protein (g) | 0.021 |
| Niacin (mg) | -0.246 |
| Riboflavin (mg) | -0.098 |
| Carbohydrate (g) | 0.097 |
| MUFA (g) | -0.009 |
| PUFA (g) | -0.337 |
| Saturated fat (g) | 0.373 |
| (n-3) Fatty acids | -0.436 |
| (n-6) Fatty acids | -0.159 |

Z *score* = ((daily mean intakeglobal daily mean intake)/standard deviation)

Z *score* = Z *score*(converted a percentile score)21

DII =

| **Supplementary Table 2.** On cause of death information all-cause, CVD specific, and cancer specific). | |
| --- | --- |
| The cause of death | ICD codes |
| Accidents unintentional injuries) | V01-X59, Y85-Y86 |
| All other causes (residual) | - |
| Alzheimer's disease | G30 |
| Cerebrovascular diseases | I60-I69 |
| Chronic lower respiratory diseases | J40-J47 |
| Diabetes mellitus | E10-E14 |
| Diseases of heart | I00-I09, I11, I13, I20-I51 |
| Influenza and pneumonia | J09-J18 |
| Malignant neoplasms | C00-C97 |
| Nephritis, nephrotic syndrome and nephrosis | N00-N07, N17-N19, N25-N27 |

Abbreviations: CVD, cardiovascular disease.

| **Supplementary Table 3.** Summary of all variables. | |
| --- | --- |
| Variables | Analytical method |
| Age, years | Questionnaire |
| Gender, n (%) | Questionnaire |
| Race, n (%) | Questionnaire |
| Family PIR | Questionnaire |
| Education level, n (%) | Questionnaire |
| Marital status, n (%) | Questionnaire |
| Smoker, n (%) | Questionnaire |
| Alcohol user, n (%) | Questionnaire |
| Hypertension, n (%) | Questionnaire or SBP, and DBP |
| DM, n (%) | Questionnaire or FBG or HbA1c |
| CHD, n (%) | Questionnaire |
| CHF, n (%) | Questionnaire |
| Angina pectoris, n (%) | Questionnaire |
| Heart attack, n (%) | Questionnaire |
| Stroke, n (%) | Questionnaire |
| SBP, mmHg | Mercury column type sphygmomanometer |
| DBP, mmHg | Mercury column type sphygmomanometer |
| BMI, kg/m2 | Body measurement |
| Waist circumference, cm | Body measurement |
| Mean energy | Dietary interview |
| intake, kcal |  |
| Hb, g/dL | Beckman Synchron LX20 |
| FBG, mg/dL | Beckman Synchron LX20 |
| HDL-C, mg/dL | Beckman Synchron LX20 |
| TC, mg/dL | Beckman Synchron LX20 |
| TG, mg/dL | Beckman Synchron LX20 |
| BUN, mg/dL | Beckman Synchron LX20 |
| UA, mg/dL | Beckman Synchron LX20 |
| Scr, mg/dL | Beckman Synchron LX20 |
| eGFR, ml/min/1.73m2 | CKD-EPI |
| All-cause mortality, n (%) | Questionnaire |
| Cardiovascular-related mortality, n (%) | Questionnaire |
| Cancer-related mortality, n (%) | Questionnaire |

Abbreviations: family PIR, family poverty income ratio; DM, diabetes mellitus; CHD, coronary heart disease; CHF, congestive heart failure; BMI, body mass index; Hb, hemoglobin; FBG, fast blood glucose; HbA1c, glycosylated hemoglobin; HDL-C, high-density lipoprotein-cholesterol; TC, total cholesterol; TG, triglyceride; BUN, blood urea nitrogen; UA, uric acid; Scr, serum creatinine; eGFR, estimated glomerular filtration rate.
